# Supplementary material
Source: PubMed Central journal article supplement (PMC3944388)

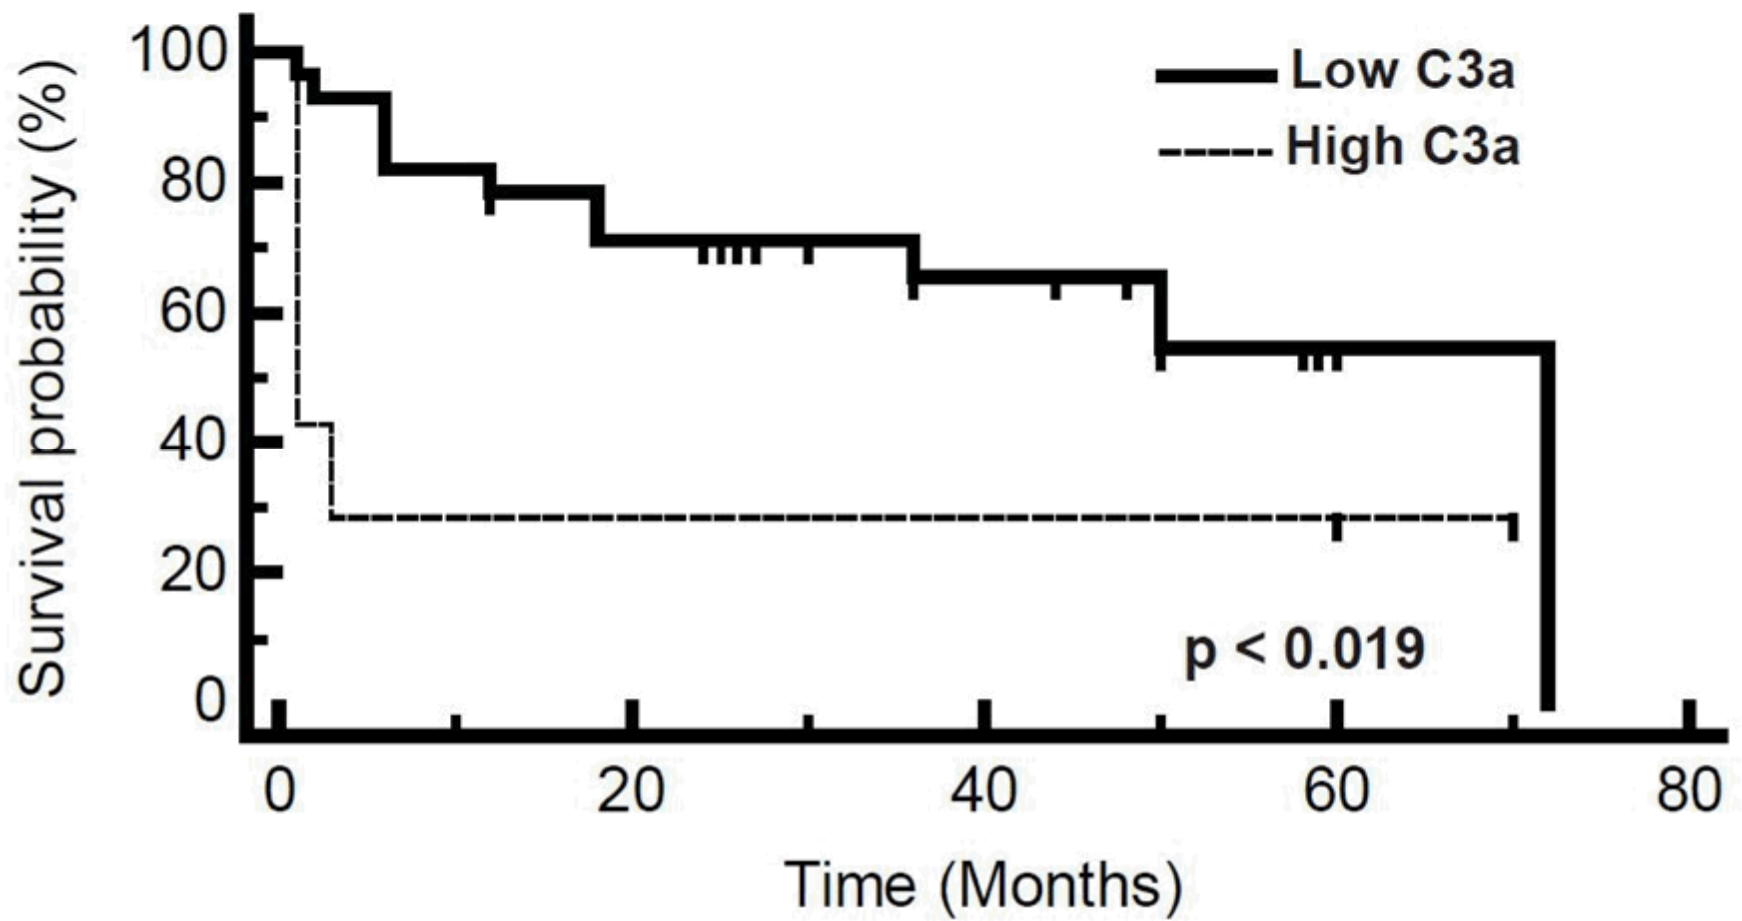

# Supplemental Figure 2

## A. V3 = 0 ml

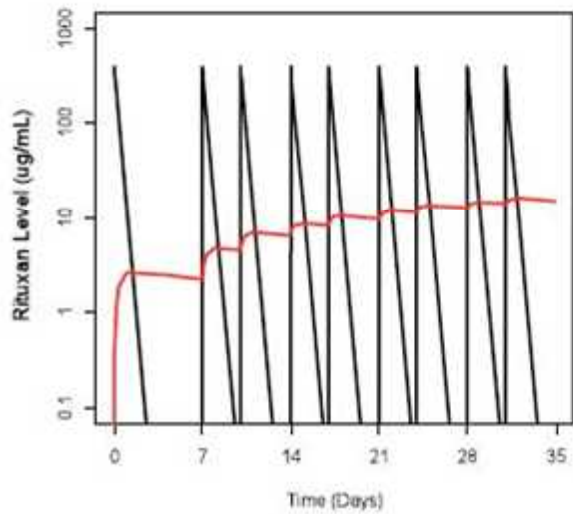

## B. V3 = 320 ml

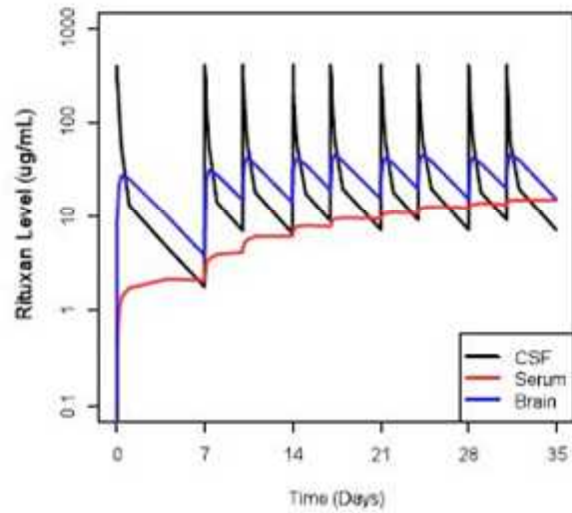

## C. V3 = 5000 ml

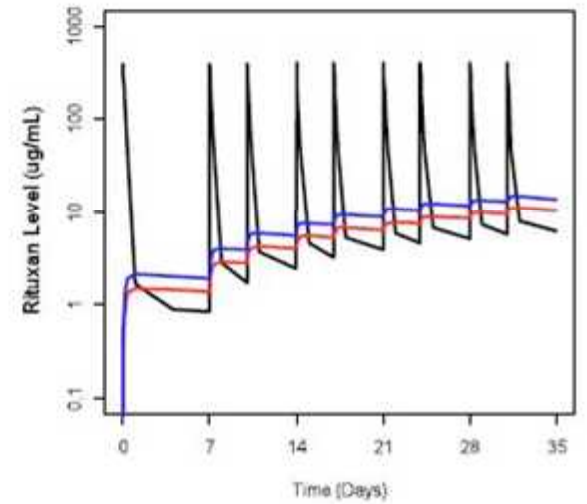

Supplement: NIHMS537867-supplement-supplement_1.pdf [file NIHMS537867-supplement-supplement_1.pdf]
